# Supplementary material
Source: PubMed Central journal article supplement (PMC3496069)
Supplement: NIHMS408347-supplement-01.pdf [file NIHMS408347-supplement-01.pdf]

A.

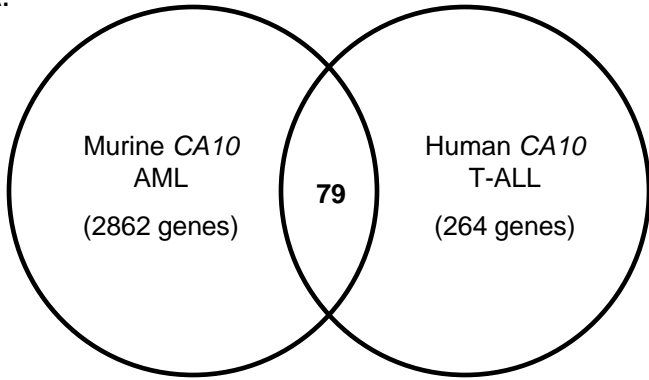

### Up-regulated genes

|         |           |         |          |        |        |
|---------|-----------|---------|----------|--------|--------|
| MYADM   | SPAG9     | HOXA9   | TMX4     | MBOAT7 | RALBP1 |
| ASAH1   | WDR26     | EHBP1L1 | SLC29A3  | SQSTM1 | DNAJC1 |
| ATP7A   | SLC6A6    | DOCK5   | CCNDBP1  | DCP2   | TSG101 |
| CCPG1   | BMP2K     | KHNYN   | BATF     | NIPBL  | FLCN   |
| USP12   | SP100     | CD33    | BNIP3L   | NFAT5  | TOX4   |
| ZFP36   | RPS6KA5   | NCOA3   | MATK     | INPP5D |        |
| KLHL2   | HLX       | MAP4K5  | BRD4     | PHLPP2 |        |
| STX3    | SNX18     | GPR146  | CDC42EP3 | NR2F6  |        |
| JUNB    | LPGAT1    | DENND3  | RXRA     | H2AFY  |        |
| MEIS1   | FUCA2     | SLAIN2  | ABHD4    | MAP2K3 |        |
| RAPGEF2 | HOXA5     | RSF1    | TLE4     | PCTP   |        |
| FNIP1   | PIP4K2A   | ADAP1   | WNK1     | CGRRF1 |        |
| TBC1D23 | STAT3     | TBK1    | TPM1     | CTNNA1 |        |
| RALB    | SECISBP2L | ABHD5   | DHRS1    | GRINA  |        |
| ITCH    | NFKBID    | HES6    | MED13L   | VPS13B |        |

B.

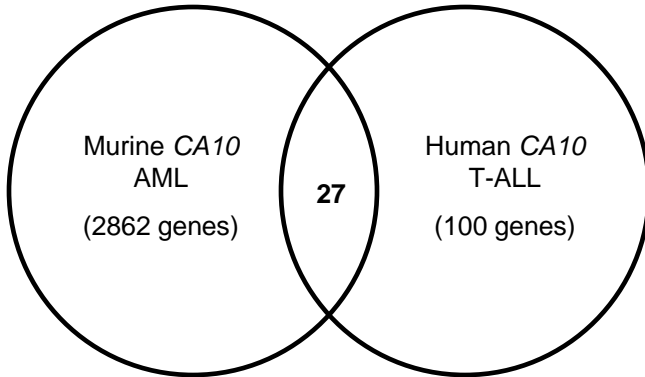

### Up-regulated genes

|         |         |
|---------|---------|
| CCND2   | IER3    |
| CD14    | KCNK12  |
| CEBPB   | KLRK1   |
| CEBPD   | LAPTM4B |
| CSF3R   | LRMP    |
| CSRP2   | MEF2A   |
| CST3    | MEF2C   |
| CTSG    | MEIS1   |
| DUSP5   | PALLD   |
| FAM105A | PRTN3   |
| FAM46A  | RAB31   |
| FCER1G  | RAB32   |
| FLT3    | SELL    |
| HOXA9   |         |

**Supplemental Figure 1.** (A) Venn diagram and list of genes up-regulated 1.5 fold in both murine *CA10* AMLs and human *CA10* positive T-ALL samples (34). (B) Venn diagram and list of genes associated with *CA10* AMLs and human *CA10* positive leukemias (35).
