# Supplementary material
Source: PubMed Central journal article supplement (PMC3496069)
Supplement: NIHMS408347-supplement-02.pdf [file NIHMS408347-supplement-02.pdf]

### MEIS1 and FLT3 Correlation in Human T-ALL

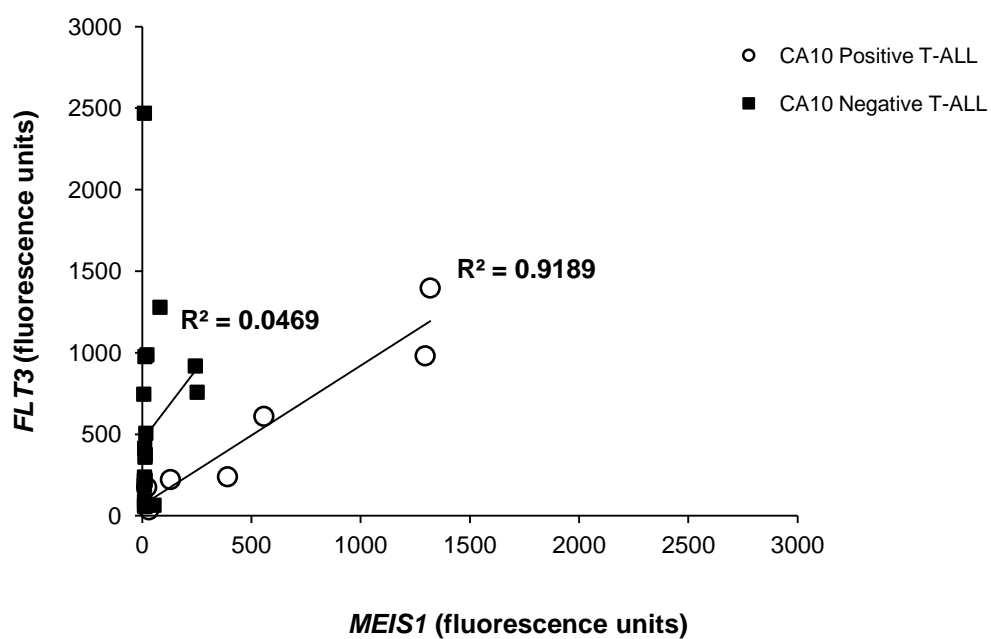

**Supplemental Figure 2.** Correlation of *MEIS1* and *FLT3* expression in *CA10* positive and *CA10* negative T-ALL.
